# Supplementary material for: Identification and Evaluation of Reliable Reference Genes for Quantitative Real-Time PCR Analysis in Tea Plant (Camellia sinensis (L.) O. Kuntze)
Source: MDPI journal article supplement (doi:10.3390/ijms151222155), 2014-12-02
Supplement: s1 [file s1]

# Supplementary Information

Figure S1. The melting curve of eleven candidate reference genes.

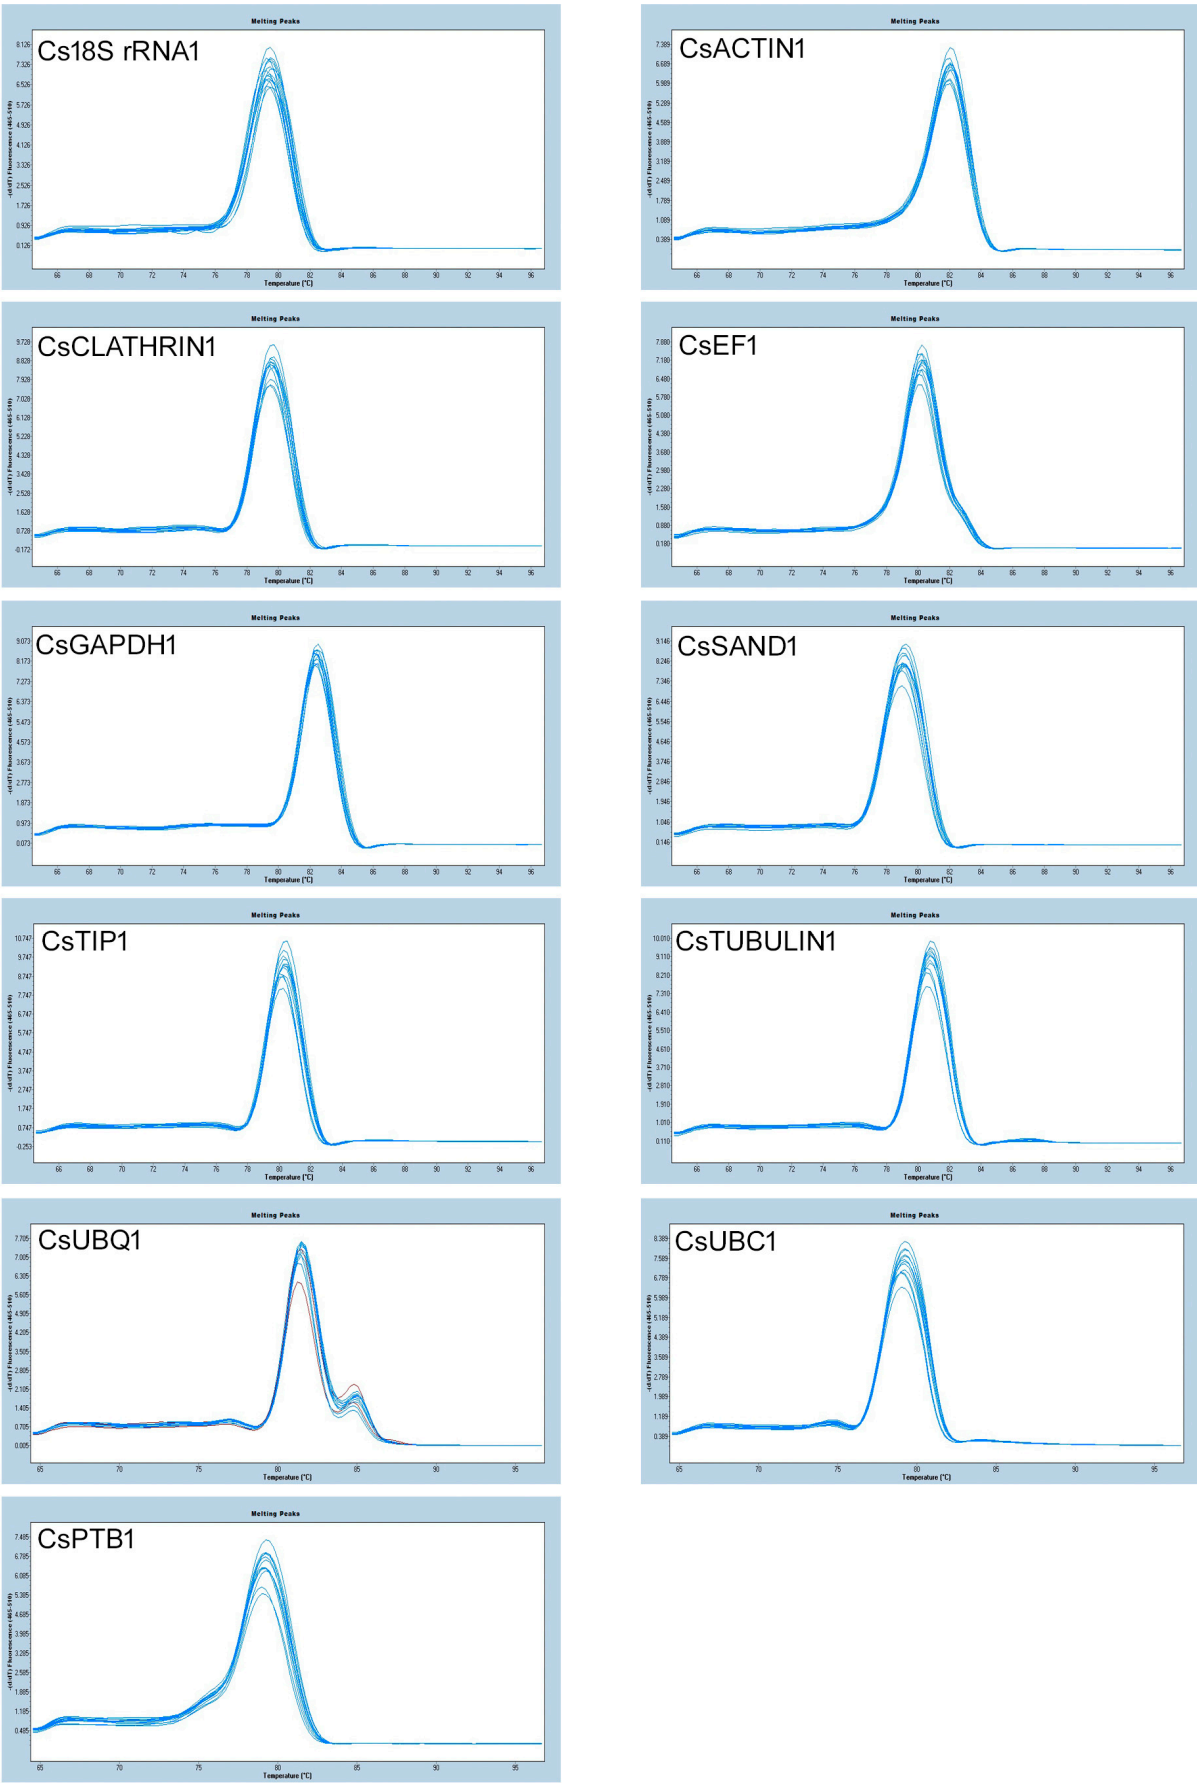

**Figure S2.** The PCR products electrophoresis result of the eleven candidate reference genes.

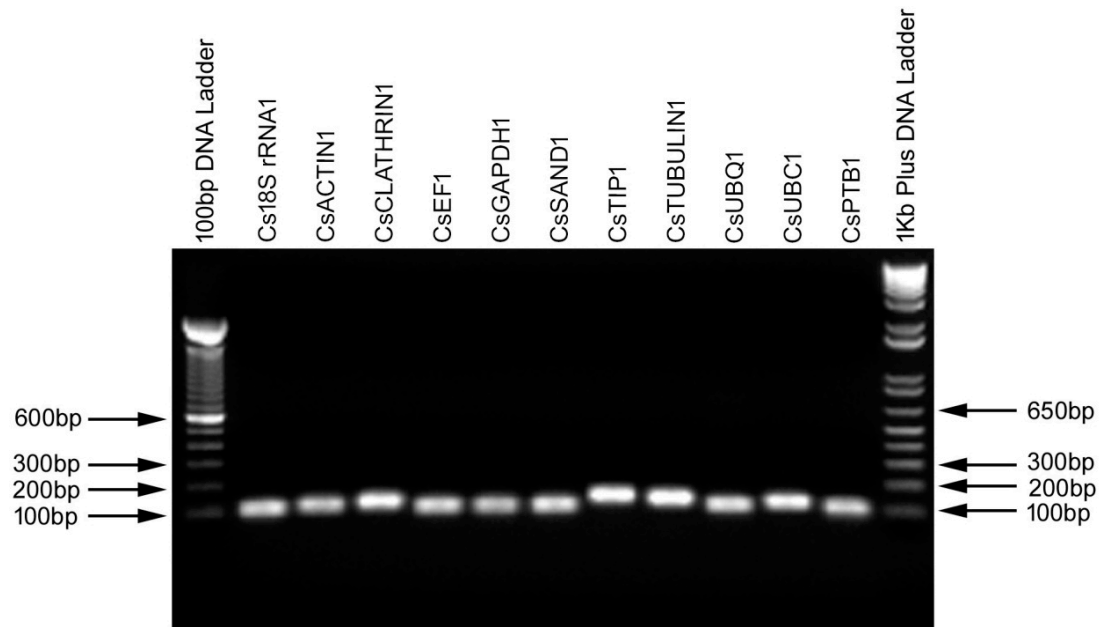

**Figure S3.** Recommend comprehensive ranking results for candidate reference genes. Above figures show the comprehensive gene stability of candidate reference genes in different experimental sets. (A) diurnal expression in leaves; (B) different organs; (C) leaves with different duration of cold and short photoperiod treatment; (D) shoots with different duration of cold and short photoperiod treatment; (E) shoots after auxin antagonist treatment; (F) shoots after lanolin treatment. The smaller the ranking value, the better the stability of reference gene. (PTB: *CsPTB1*; clathrin: *CsCLATHRIN1*; UBC: *CsUBC1*; SAND: *CsSAND1*; tubulin: *CsTUBULIN1*; EF: *CsEF1*; TIP: *CsTIP1*; UBQ: *CsUBQ1*; GAPDH: *CsGAPDH1*; 18S rRNA: *Cs18S rRNA1*; actin: *CsACTIN1*).

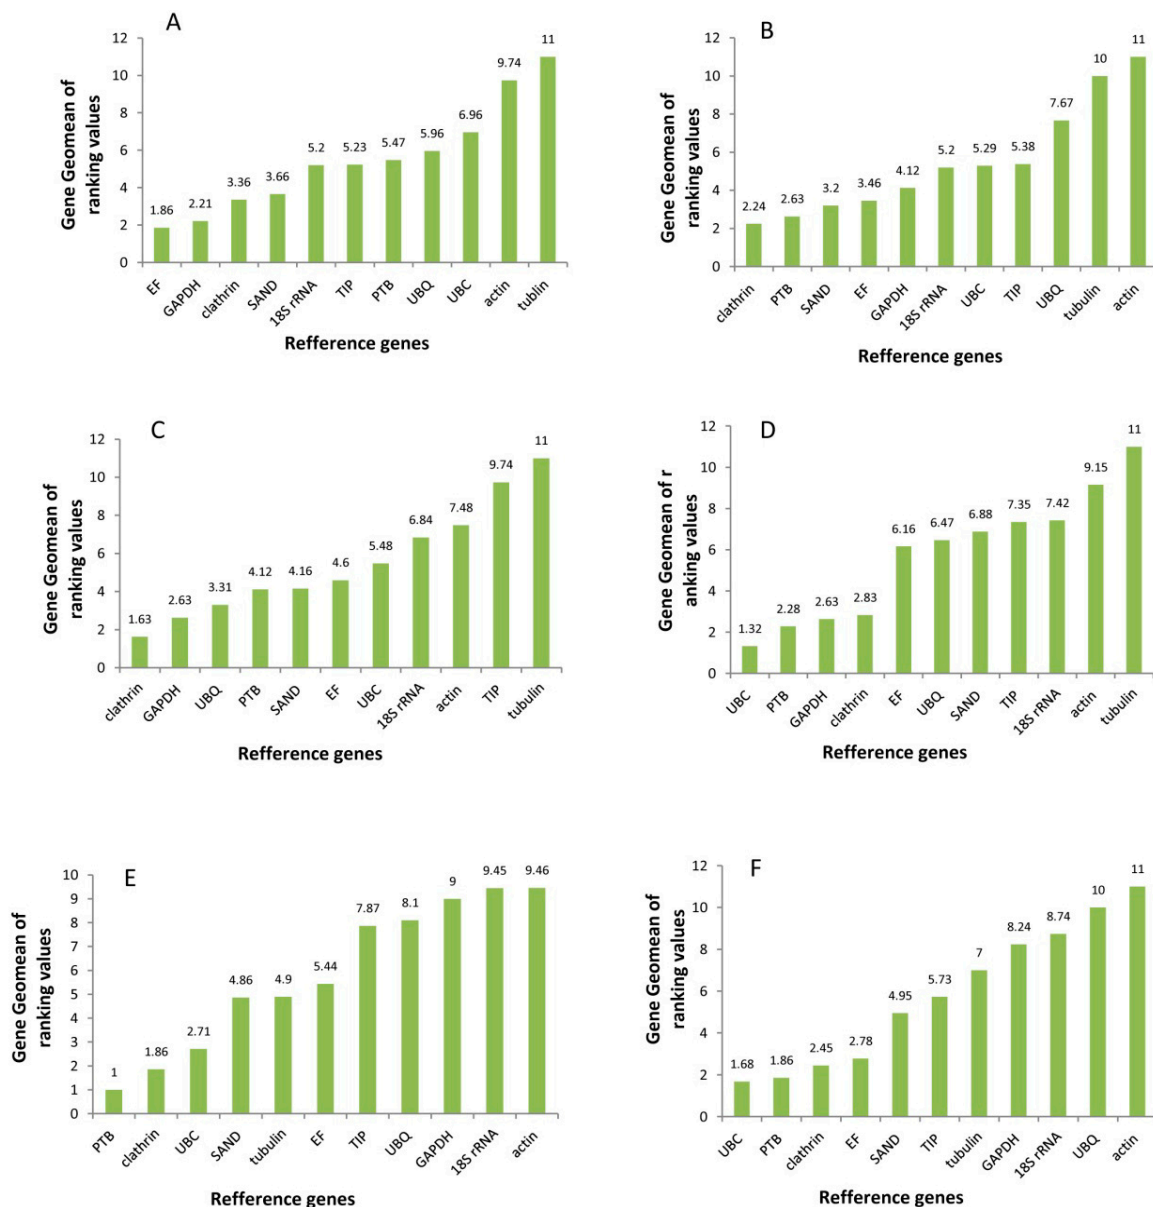

**Table S1.** Primer specificity performance at different annealing temperature.

| Gene Name          | Tested Annealing Temperature |       |       |       |
|--------------------|------------------------------|-------|-------|-------|
|                    | 50 °C                        | 53 °C | 56 °C | 59 °C |
| <i>Cs18S rRNA1</i> | XXX                          | XXX   | XXXX  | XXX   |
| <i>CsACTIN1</i>    | XX                           | XXX   | XXXX  | XXX   |
| <i>CsCLATHRIN1</i> | XXX                          | XXX   | XXX   | XXXX  |
| <i>CsEF1</i>       | XX                           | XXX   | XXXX  | XXX   |
| <i>CsGAPDH1</i>    | XX                           | XXX   | XXXX  | XXX   |
| <i>CsSAND1</i>     | XXX                          | XXX   | XXX   | XXXX  |
| <i>CsTIP1</i>      | XXX                          | XXXX  | XXX   | XXX   |
| <i>CsTUBULIN1</i>  | XXXX                         | XXX   | XXX   | XXX   |
| <i>CsUBQ1</i>      | X                            | XX    | XXX   | XXXX  |
| <i>CsUBC1</i>      | XXX                          | XXX   | XXXX  | XXX   |
| <i>CsPTB1</i>      | XXX                          | XXX   | XXXX  | XXX   |

Poor: X; Acceptable: XX; Good: XXX; Best: XXXX.
